# Supplementary material for: An Integrated Analysis of Intracellular Metabolites and Virulence Gene Expression during Biofilm Development of a Clinical Isolate of Candida tropicalis on Distinct Surfaces
Source: MDPI journal article supplement (doi:10.3390/ijms22169038), 2021-08-21
Supplement: s1 [file s1]

# An Integrated Analysis of Intracellular Metabolites and Virulence Gene Expression during Biofilm Development of a Clinical Isolate of *Candida tropicalis* on Distinct Surfaces

Maria Michela Salvatore <sup>1</sup>, Angela Maione <sup>2</sup>, Luisa Albarano <sup>2</sup>, Elisabetta de Alteriis <sup>2</sup>, Federica Carraturo <sup>2</sup>, Anna Andolfi <sup>1,3</sup>, Francesco Salvatore <sup>1</sup>, Emilia Galdiero <sup>2\*</sup>, Marco Guida <sup>2</sup>

<sup>1</sup> Department of Chemical Sciences, University of Naples 'Federico II', via Cinthia, 80126 Naples, Italy; [mariamichela.salvatore@unina.it](mailto:mariamichela.salvatore@unina.it) (M.M.S.); [andolfi@unina.it](mailto:andolfi@unina.it) (A.A.); [frsalvat@unina.it](mailto:frsalvat@unina.it) (F.S.)

<sup>2</sup> Department of Biology, University of Naples 'Federico II', via Cinthia, 80126 Naples, Italy; [egaldier@unina.it](mailto:egaldier@unina.it) (E.G.); [angela.maione@unina.it](mailto:angela.maione@unina.it) (A.M.); [luisa.albarano@unina.it](mailto:luisa.albarano@unina.it) (L.A.); [dealteriis@unina.it](mailto:dealteriis@unina.it) (E.d.A.); [federica.carraturo@unina.it](mailto:federica.carraturo@unina.it) (F.C.); [marco.guida@unina.it](mailto:marco.guida@unina.it) (M.G.)

<sup>3</sup> BAT Center—Interuniversity Center for Studies on Bioinspired Agro-Environmental Technology, University of Naples 'Federico II', 80055 Naples, Italy

\* Correspondence: [egaldier@unina.it](mailto:egaldier@unina.it) Tel.: +39-081-679182

**Table S1.** Results of univariate comparison between PolyStyr and PTFE biofilm classes. VIP scores reported in column 3 have been obtained after PLS-DA analysis shown in Figure 5B. Up = Upregulated in PolyStyr class; Down = Downregulated in PolyStyr class. Identified metabolites can be tracked back to identified metabolites in Table 1 through the associated ID\_# string.

| Name                                                                          | ID_#  | VIP   | p_Value   | Fold Change | Trend |
|-------------------------------------------------------------------------------|-------|-------|-----------|-------------|-------|
| Trehalose, 8TMS                                                               | ID_62 | 1.512 | 0.0001884 | 17.88       | Down  |
| D-Mannitol, 6TMS                                                              | ID_26 | 1.500 | 0.0002933 | 2.14        | Down  |
| Glycerol monostearate, 2TMS                                                   | ID_31 | 1.471 | 0.0003684 | 5.793       | Up    |
| Tromethamine, 4TMS                                                            | ID_15 | 1.444 | 0.001048  | 1.491       | Up    |
| 1-Monopalmitin, 2TMS                                                          | ID_30 | 1.414 | 0.001973  | 3.451       | Up    |
| Succinic acid, 2TMS                                                           | ID_37 | 1.396 | 0.003483  | 4.23        | Down  |
| Phosphoric acid, 3TMS                                                         | ID_8  | 1.360 | 0.00489   | 1.941       | Up    |
| L-Aspartic acid, 3TMS                                                         | ID_16 | 1.256 | 0.01747   | 1.374       | Up    |
| Palmitic Acid, TMS                                                            | ID_27 | 1.167 | 0.03538   | 1.477       | Up    |
| L-Lysine, 3TMS                                                                | ID_34 | 1.162 | 0.0413    | 4.39        | Up    |
| L-Proline, 2TMS                                                               | ID_9  | 1.122 | 0.04607   | 1.57        | Up    |
| Stearic acid, TMS                                                             | ID_28 | 1.013 | 0.08639   | 1.376       | Up    |
| Tromethamine N-acetyl, 3TMS                                                   | ID_19 | 1.036 | 0.09284   | 1.254       | Down  |
| L-Tyrosine, 3TMS                                                              | ID_25 | 0.971 | 0.1014    | 1.503       | Down  |
| Arachidic acid, TMS                                                           | ID_29 | 0.887 | 0.1186    | 2.608       | Up    |
| Malic acid, 3TMS                                                              | ID_14 | 0.935 | 0.1231    | 1.338       | Up    |
| Phosphoric acid, bis(trimethylsilyl) 2,3-bis[(trimethylsilyl)oxy]propyl ester | ID_22 | 0.921 | 0.1304    | 1.117       | Up    |
| Methyl bis(trimethylsilyl) phosphate                                          | ID_67 | 0.896 | 0.1517    | 2.408       | Down  |
| L-5-Oxoproline, 2TMS                                                          | ID_17 | 0.884 | 0.1551    | 1.632       | Up    |
| L-Alanine, 2TMS                                                               | ID_4  | 0.900 | 0.163     | 1.13        | Up    |
| Citric acid, 4TMS                                                             | ID_36 | 0.830 | 0.192     | 1.711       | Up    |
| Leucine, 2TMS                                                                 | ID_32 | 0.779 | 0.2312    | 1.279       | Up    |
| Lactic Acid, 2TMS                                                             | ID_3  | 0.788 | 0.2567    | 1.262       | Down  |
| L-Glutamic acid, 3TMS                                                         | ID_20 | 0.695 | 0.3027    | 1.098       | Up    |
| Vitamine B6, 3TMS                                                             | ID_24 | 0.664 | 0.3122    | 1.478       | Down  |
| Glycine, 2TMS                                                                 | ID_5  | 0.599 | 0.431     | 1.421       | Up    |
| Serine, 3TMS                                                                  | ID_11 | 0.556 | 0.436     | 1.099       | Up    |
| D-Arabitol, 5TMS                                                              | ID_21 | 0.618 | 0.4942    | 1.263       | Down  |
| L-Valine, 2TMS                                                                | ID_7  | 0.508 | 0.5171    | 1.108       | Up    |
| Fumaric acid, 2TMS                                                            | ID_10 | 0.412 | 0.5942    | 1.076       | Down  |
| L-Threonine, 3TMS                                                             | ID_12 | 0.442 | 0.6882    | 1.061       | Down  |
| L-Phenylalanine, 2TMS                                                         | ID_39 | 0.159 | 0.8769    | 1.128       | Down  |

**Table S2.** Results of univariate comparison between PolyStyr and PolyCarb biofilm classes. VIP scores reported in column 3 have been obtained after PLS-DA analysis shown in Figure 5C. Up = Upregulated in PolyStyr class; Down = Downregulated in PolyStyr class. Metabolites can be tracked back to identified metabolites in Table 1 through the associated ID\_## string.

| Name                                                                          | ID_## | VIP   | p-Value   | Fold Change | Trend |
|-------------------------------------------------------------------------------|-------|-------|-----------|-------------|-------|
| Vitamine B6, 3TMS                                                             | ID_24 | 1.141 | 1.80E-07  | 24.23       | Up    |
| D-Mannitol, 6TMS                                                              | ID_26 | 1.139 | 4.71E-07  | 26.74       | Up    |
| L-Glutamic acid, 3TMS                                                         | ID_20 | 1.134 | 1.95E-06  | 7.037       | Up    |
| Tromethamine, 4TMS                                                            | ID_15 | 1.134 | 2.25E-06  | 7.731       | Up    |
| Phosphoric acid, bis(trimethylsilyl) 2,3-bis[(trimethylsilyl)oxy]propyl ester | ID_22 | 1.132 | 3.11E-06  | 5.842       | Up    |
| L-Alanine, 2TMS                                                               | ID_4  | 1.129 | 8.32E-06  | 19.81       | Up    |
| L-Aspartic acid, 3TMS                                                         | ID_16 | 1.125 | 1.63E-05  | 37.74       | Up    |
| 9-Hexadecenoic acid, (Z)-, TMS                                                | ID_46 | 1.127 | 1.66E-05  | 284.9       | Down  |
| Tromethamine N-acetyl, 3TMS                                                   | ID_19 | 1.115 | 4.90E-05  | 47.16       | Up    |
| L-Proline, 2TMS                                                               | ID_9  | 1.096 | 0.0001976 | 3.425       | Up    |
| Fumaric acid, 2TMS                                                            | ID_10 | 1.101 | 0.0002055 | 15.86       | Up    |
| Phosphoric acid, 3TMS                                                         | ID_8  | 1.092 | 0.0002459 | 6.733       | Up    |
| Serine, 3TMS                                                                  | ID_11 | 1.09  | 0.0002681 | 2.374       | Up    |
| L-Threonine, 3TMS                                                             | ID_12 | 1.087 | 0.000326  | 6.863       | Up    |
| Glycerol monostearate, 2TMS                                                   | ID_31 | 1.065 | 0.0005854 | 3.687       | Up    |
| L-Phenylalanine, 2TMS                                                         | ID_39 | 1.051 | 0.001145  | 4.095       | Down  |
| Malic acid, 3TMS                                                              | ID_14 | 1.055 | 0.001221  | 4.897       | Up    |
| Succinic acid, 2TMS                                                           | ID_37 | 1.04  | 0.002126  | 4.297       | Down  |
| Leucine, 2TMS                                                                 | ID_32 | 1.037 | 0.002684  | 1.939       | Down  |
| Citric acid, 4TMS                                                             | ID_36 | 1.034 | 0.002882  | 36.7        | Up    |
| Lactic Acid, 2TMS                                                             | ID_3  | 1.028 | 0.003494  | 17.47       | Up    |
| 1-Monopalmitin, 2TMS                                                          | ID_30 | 1.018 | 0.003576  | 2.649       | Up    |
| Stearic acid, TMS                                                             | ID_28 | 0.991 | 0.005386  | 87.32       | Down  |
| L-5-Oxoproline, 2TMS                                                          | ID_17 | 0.953 | 0.01129   | 6.664       | Up    |
| L-Valine, 2TMS                                                                | ID_7  | 0.941 | 0.01352   | 1.836       | Up    |
| L-Lysine, 3TMS                                                                | ID_34 | 0.944 | 0.01539   | 30.27       | Up    |
| 9,12-Octadecadienoic acid (Z,Z)-, TMS                                         | ID_48 | 0.895 | 0.02407   | 4289        | Down  |
| Palmitic Acid, TMS                                                            | ID_27 | 0.887 | 0.02608   | 63.07       | Down  |
| Arachidic acid, TMS                                                           | ID_29 | 0.901 | 0.02667   | 5.934       | Up    |
| 9-Octadecenoic acid, (E)-, TMS                                                | ID_49 | 0.842 | 0.03767   | 2345        | Down  |
| Glycine, 2TMS                                                                 | ID_5  | 0.689 | 0.1044    | 1.559       | Down  |
| L-Tyrosine, 3TMS                                                              | ID_25 | 0.284 | 0.6991    | 1.113       | Up    |
| D-Arabitol, 5TMS                                                              | ID_21 | 0.208 | 0.8781    | 1.057       | Down  |

**Table S3.** Results of univariate comparison between PTFE and PolyCarb biofilm classes. VIP scores reported in column 3 have been obtained after PLS-DA analysis shown in Figure 5D. Up = Upregulated in PTFE class; Down = Downregulated in PTFE class. Metabolites can be tracked back to identified metabolites in Table 1 through the associated ID\_## string.

| Name                                                                          | ID_## | VIP   | p-Value   | Fold Change | Trend |
|-------------------------------------------------------------------------------|-------|-------|-----------|-------------|-------|
| L-Alanine, 2TMS                                                               | ID_4  | 1.149 | 4.50E-08  | 17.53       | Up    |
| Lactic Acid, 2TMS                                                             | ID_3  | 1.145 | 3.77E-07  | 29.54       | Up    |
| Phosphoric acid, bis(trimethylsilyl) 2,3-bis[(trimethylsilyl)oxy]propyl ester | ID_22 | 1.145 | 6.86E-07  | 5.231       | Up    |
| Malic acid, 3TMS                                                              | ID_14 | 1.142 | 1.26E-06  | 3.659       | Up    |
| Tromethamine, 4TMS                                                            | ID_15 | 1.140 | 1.80E-06  | 5.184       | Up    |
| Phosphoric acid, 3TMS                                                         | ID_8  | 1.139 | 2.23E-06  | 3.469       | Up    |
| Fumaric acid, 2TMS                                                            | ID_10 | 1.141 | 4.63E-06  | 22.86       | Up    |
| L-Aspartic acid, 3TMS                                                         | ID_16 | 1.135 | 5.68E-06  | 27.74       | Up    |
| Tromethamine N-acetyl, 3TMS                                                   | ID_19 | 1.135 | 6.36E-06  | 79.25       | Up    |
| D-Mannitol, 6TMS                                                              | ID_26 | 1.135 | 6.93E-06  | 76.69       | Up    |
| L-5-Oxoproline, , 2TMS                                                        | ID_17 | 1.129 | 1.50E-05  | 4.083       | Up    |
| 9-Hexadecenoic acid, (Z)-, TMS                                                | ID_46 | 1.131 | 1.66E-05  | 381.8       | Down  |
| L-Glutamic acid, 3TMS                                                         | ID_20 | 1.126 | 2.31E-05  | 6.411       | Up    |
| L-Threonine, 3TMS                                                             | ID_12 | 1.120 | 4.93E-05  | 7.284       | Up    |
| Leucine, 2TMS                                                                 | ID_32 | 1.111 | 0.0001643 | 2.48        | Down  |
| Trehalose, 8TMS                                                               | ID_62 | 1.107 | 0.0001884 | 17.88       | Up    |
| L-Tyrosine, 3TMS                                                              | ID_25 | 1.083 | 0.0005107 | 1.673       | Up    |
| Serine, 3TMS                                                                  | ID_11 | 1.075 | 0.0007716 | 2.161       | Up    |
| L-Valine, 2TMS                                                                | ID_7  | 1.053 | 0.001654  | 1.657       | Up    |
| L-Phenylalanine, 2TMS                                                         | ID_39 | 1.025 | 0.002859  | 3.693       | Down  |
| Stearic acid, TMS                                                             | ID_28 | 1.000 | 0.005307  | 120.1       | Down  |
| Glycine, 2TMS                                                                 | ID_5  | 0.959 | 0.007792  | 2.251       | Down  |
| Vitamine B6, 3TMS                                                             | ID_24 | 0.955 | 0.0154    | 48          | Up    |
| 9,12-Octadecadienoic acid (Z,Z)-, TMS                                         | ID_48 | 0.891 | 0.02406   | 5748        | Down  |
| Palmitic Acid, TMS                                                            | ID_27 | 0.885 | 0.02557   | 93.12       | Down  |
| Methyl bis(trimethylsilyl) phosphate                                          | ID_67 | 0.891 | 0.02601   | 5.282       | Up    |
| L-Proline, 2TMS                                                               | ID_9  | 0.899 | 0.02836   | 2.181       | Up    |
| Citric acid, 4TMS                                                             | ID_36 | 0.878 | 0.02969   | 28.75       | Up    |
| L-Lysine, 3TMS                                                                | ID_34 | 0.855 | 0.03681   | 9.24        | Up    |
| 9-Octadecenoic acid, (E)-, TMS                                                | ID_49 | 0.848 | 0.03767   | 3143        | Down  |
| 1-Monopalmitin, 2TMS                                                          | ID_30 | 0.887 | 0.04087   | 1.303       | Down  |
| Arachidic acid, TMS                                                           | ID_29 | 0.691 | 0.1341    | 3           | Up    |
| Xylitol, 5TMS                                                                 | ID_21 | 0.614 | 0.1767    | 1.195       | Up    |
| Succinic acid, 2TMS                                                           | ID_37 | 0.560 | 0.2766    | 1.122       | Down  |
| Glycerol monostearate, 2TMS                                                   | ID_31 | 0.460 | 0.4352    | 1.543       | Down  |

**Table S4.** Name, acronym, sequence and references of used primer for *RT-qPCR*.

| Name                                 | Acronym | Primer sequence (5'-3')     | References |
|--------------------------------------|---------|-----------------------------|------------|
| <i>heat shock protein 21</i>         | hsp21_F | TTATGATTGTCGGGGTTGCT        | [1]        |
|                                      | hsp21_R | GCCAATGGACCAGCATACCT        |            |
| <i>secreted aspartyl proteases 1</i> | SAP1_F  | TATGACAATGTGCCAGTT          | [2]        |
|                                      | SAP1_R  | TAAAGCAGTCAAAGTCCC          |            |
| <i>secreted aspartyl proteases 2</i> | SAP2_F  | GCTGGTTTCTGTGCTTTG          | [2]        |
|                                      | SAP2_R  | CCACGTAGGCATGTCTTA          |            |
| <i>secreted aspartyl proteases 3</i> | SAP3_F  | ACTTGGATTTCAGCGAAGA         | [2]        |
|                                      | SAP3_R  | AGCCCTTCCAATGCCTAAAT        |            |
| <i>CYR 1</i>                         | CYR1_F  | CCAACAAACGACCAAAAGGT        | [3]        |
|                                      | CYR1_R  | TCTTGAAGTCCAGACGATG         |            |
| <i>agglutinin-like sequences 3</i>   | ALS3_F  | AGGTGCTGTAGTTGTTCTT         | [2]        |
|                                      | ALS3_R  | AGCAGTCGGGTGAAAGG           |            |
| <i>actin</i>                         | Actin_F | GGCTGGTAGAGACTTGACCAACCATTG | [4]        |
|                                      | Actin_R | GGAGTTGAAAGTGGTTTGGTCAATAC  |            |

## References

1. Wang, H.; Li, Q.; Peng, Y.; Zhang, Z.; Kuang, X.; Hu, X.; Ayepa, E.; Han, X.; Abrha, G.T.; Xiang, Q.; et al. Cellular analysis and comparative transcriptomics reveal the tolerance mechanisms of *Candida tropicalis* toward phenol. *Front. Microbiol.* **2020**, *11*, 1–19.
2. Yu, S.; Li, W.; Liu, X.; Che, J.; Wu, Y.; Lu, J. Distinct expression levels of ALS, LIP, and SAP genes in *Candida tropicalis* with diverse virulent activities. *Front. Microbiol.* **2016**, *7*, 1–10.
3. Kim, D.J.; Lee, M.W.; Choi, J.S.; Lee, S.G.; Park, J.Y.; Kim, S.W. Inhibitory activity of hinokitiol against biofilm formation in fluconazole-resistant *Candida* species. *PLoS One* **2017**, *12*, 1–11.
4. Losberger, Christophe, Ernst, J.F. Sequence of the *Candida albicans* gene encoding acti. *Nucleic Acids Res.* **1989**, *17*, 9488.
